# Supplementary material for: Progesterone induces meiosis through two obligate co-receptors with PLA2 activity
Source: eLife. 2025 Jan 28;13:RP92635. doi: 10.7554/eLife.92635 (PMC11774516; doi:10.7554/eLife.92635)
Supplement: Supplementary file 1. — (a) List of antibodies, chemicals, and reagents. (b) List of antisense oligonucleotides and primers. [file elife-92635-supp1.xlsx]

## Sheet: 1a - Table 1 CLP T5min_T0
	Supplemental TABLE 1 *			Fold Change T5/T0 min
	SUPER_PATHWAY	SUB_PATHWAY	BIOCHEMICAL	Naive	p	mPR-KD	p	ABHD2-KD	p
	Sphingolipids	Ceramide	CER(14:0)	0.841	0.044	1.00057	0.994656	1.17155	0.0656912
			CER(18:0)	0.876	0.165	1.0799	0.418466	1.231	0.0300102
			CER(26:0)	0.868	0.159	1.00861	0.931589	1.244	0.0302444
		Hexosylceramide	HCER(26:1)	0.836	0.108	0.960634	0.717995	1.26	0.0389482
			HCER(20:0)	0.851	0.236	1.10604	0.458522	1.366	0.0230159
		Lactosylceramide	LCER(20:1)	0.81	0.046	0.911689	0.378592	1.10125	0.358405
	Phosphatidylethanolamine	PE Ester	PE(14:0/22:6)	0.816522	0.0503103	0.908658	0.352195	1.16611	0.136595
			PE(17:0/20:2)	1.048	0.507	1	1	0.802768	0.0024314
			PE(16:0/18:4)	0.871	0.238036	1.05805	0.627567	1.28087	0.0348054
		PE Plasmalogen	PE(P-16:0/22:2)	0.800639	0.0445415	1.04968	0.658903	1.03184	0.775326
	Lysophosphatidylethanolamine	LPE Ester	LPE(16:1)	0.70982	0.010124	0.894877	0.399182	1.02288	0.863497
			LPE(20:4)	0.807322	0.017966	1.11054	0.242451	1.13109	0.170106
	Phosphatidylcholine	PC Ester	PC(15:0/20:3)	0.738493	0.0412601	0.989115	0.940778	1.13481	0.391353
			PC(18:2/22:4)	0.90507	0.286723	1.0206	0.827263	1.21537	0.0384109
	Lysophosphatidylcholine	LPC Ester	LPC(16:1)	0.884755	0.384586	0.959283	0.767557	1.34482	0.0367206
	MAG	Ester	MAG(22:1)	0.803708	0.0482866	0.990426	0.930192	1.04345	0.698591
	Triacylglycerol	TAG Ester	TAG53:7-FA18:3	0.830848	0.0468601	1.00521	0.955202	1.10995	0.260666
	* Include only changes that are at least 15% different

## Sheet: 1b - Table 2 CLP T30min_T0
	Supplemental TABLE 2 *			Fold Change T30/T0 min
	SUPER_PATHWAY	SUB_PATHWAY	BIOCHEMICAL	Naïve	p	mPR-KD	p	ABHD2-KD	p
	Sphingolipids	Ceramide	CER(14:0)	0.838091	0.0403704	1.00754	0.929965	1.05543	0.528127
			CER(16:0)	0.817244	0.0233193	1.17808	0.0859312	1.09118	0.322771
			CER(18:0)	0.787185	0.0127275	1.04997	0.580124	1.12735	0.207891
			CER(20:0)	0.790921	0.0234764	1.05692	0.589336	1.06534	0.537165
			CER(22:0)	0.819563	0.0258597	1.02843	0.751277	1.09006	0.330367
			CER(22:1)	0.801411	0.0249502	1.042	0.673969	1.0495	0.621313
			CER(24:0)	0.820124	0.0315267	1.02378	0.797082	1.08629	0.365858
			CER(26:0)	0.819697	0.048129	1.03325	0.743259	1.19579	0.0750924
		Hexosylceramide	HCER(20:0)	0.722743	0.0180535	1.13207	0.361865	1.18941	0.202999
			HCER(22:0)	0.835781	0.0428534	1.00815	0.926374	1.04026	0.653384
			HCER(24:0)	0.812822	0.0194019	1.00182	0.983448	1.10148	0.27159
			HCER(24:1)	0.848821	0.0401927	0.993911	0.938553	1.09424	0.256869
			Total HCER	0.839405	0.02478	1.01181	0.879172	1.08589	0.286969
		Lactosylceramide	LCER(16:0)	0.814061	0.0351178	1.03852	0.696217	1.0702	0.483768
		Sphingomyelin	SM(26:0)	0.829788	0.0216354	1.02761	0.734866	1.07359	0.377903
			SM(26:1)	0.820951	0.0492444	1.03193	0.752279	1.08498	0.413332
	Phosphatidylethanolamine	PE Ester	PE(14:0/22:6)	0.799237	0.0307447	0.90585	0.336911	1.04525	0.666924
			PE(16:0/16:0)	0.806961	0.0408121	1.13803	0.215138	1.03074	0.770963
			PE(16:0/18:1)	0.82648	0.0477431	1.02065	0.830603	1.04586	0.63898
			PE(16:0/18:3)	0.793167	0.0149575	1.01639	0.862848	1.05625	0.561219
			PE(16:0/20:3)	0.804259	0.0269178	0.997395	0.978661	1.04313	0.66508
			PE(16:0/20:4)	0.798042	0.031797	1.0238	0.82129	1.04519	0.671317
			PE(16:0/20:5)	0.79987	0.0338114	1.03473	0.743424	1.09793	0.37109
			PE(18:0/16:0)	0.797106	0.012901	1.02643	0.772207	1.01762	0.846299
			PE(18:0/20:3)	0.834371	0.0476278	0.993972	0.946865	1.04869	0.600414
			PE(18:0/20:4)	0.827276	0.0250537	1.03506	0.680988	1.0692	0.42518
			PE(18:1/16:1)	0.797672	0.0366279	1.03445	0.752198	1.05413	0.623226
			PE(18:1/18:3)	0.80051	0.0306975	1.02402	0.816075	0.990528	0.92568
			PE(18:1/20:3)	0.821834	0.0317493	0.989696	0.90893	1.02816	0.75908
			PE(18:1/20:4)	0.814899	0.0368666	1.01674	0.8644	1.05462	0.584639
			PE(18:2/16:1)	0.790769	0.029203	0.989688	0.922574	1.0473	0.664901
			PE(18:2/20:5)	0.816356	0.0407438	1.05505	0.586085	1.08208	0.423123
			PE(O-16:0/20:4)	0.823379	0.0283556	1.02381	0.788785	1.11617	0.212116
			PE(O-16:0/20:5)	0.795496	0.0168694	1.03082	0.748567	1.03616	0.707596
			PE(O-16:0/22:6)	0.83275	0.0487942	1.02077	0.823571	1.05041	0.593893
			PE(O-18:0/18:0)	0.821601	0.039809	1.12528	0.214465	1.02072	0.828773
			PE(O-18:0/18:1)	0.823648	0.0421405	1.09242	0.351429	1.03565	0.711564
			PE(O-18:0/18:3)	0.843142	0.0429809	0.928995	0.379187	1.04047	0.635363
			PE(O-18:0/20:3)	0.792491	0.0193619	1.05249	0.603267	1.02363	0.812414
			PE(O-18:0/20:4)	0.806413	0.0120262	1.06004	0.491216	1.05472	0.529291
			PE(O-18:0/20:5)	0.793968	0.0280336	1.05198	0.626328	1.10429	0.34116
		PE Plasmalogen	PE(P-16:0/18:2)	0.805284	0.0221383	1.03874	0.685044	1.07608	0.43437
			PE(P-16:0/20:4)	0.842884	0.0318272	1.02802	0.726251	1.07273	0.374389
			PE(P-16:1/18:1)	0.723978	0.00596131	1.07075	0.554998	1.11759	0.337562
			PE(P-18:0/18:3)	0.735726	0.0686768	0.862719	0.37867	0.702661	0.036708
			PE(P-18:0/20:4)	0.837321	0.0491166	1.03972	0.663732	1.05387	0.558189
			PE(P-18:1/16:1)	0.810106	0.0426005	1.09466	0.380721	1.04834	0.646926
			PE(P-18:1/20:4)	0.841661	0.0490149	1.02797	0.750988	1.05372	0.547393
			PE(P-18:1/22:4)	0.830273	0.0390394	1.05035	0.582771	1.03628	0.690141
		Total PE	Total PE	0.835798	0.0394514	1.02794	0.749757	1.05799	0.514337
	Lysophosphatidylethanolamine	LPE Ester	LPE(16:1)	0.738581	0.0226124	1.02182	0.869668	1.16413	0.249257
			LPE(20:4)	0.80169	0.0146078	1.08539	0.36049	1.13031	0.172496
	Phosphatidylcholine	PC Ester	PC(14:0/18:2)	0.828548	0.0473779	1.04663	0.628397	1.04146	0.666148
			PC(14:0/20:2)	0.800412	0.0369523	1.09969	0.369849	0.934374	0.521489
			PC(14:0/20:4)	0.792938	0.0196485	1.04016	0.689129	1.08654	0.399553
			PC(15:0/18:1)	0.838451	0.0408535	0.971308	0.733412	1.00801	0.925605
			PC(15:0/18:2)	0.806938	0.0435218	1.027	0.800486	1.05347	0.62138
			PC(16:0/18:0)	0.819084	0.0277919	1.04832	0.599655	1.04513	0.623376
			PC(16:0/18:1)	0.819275	0.0196396	1.02598	0.761617	1.05744	0.509157
			PC(16:0/20:3)	0.842529	0.047242	1.03531	0.685655	1.078	0.381506
			PC(17:0/14:1)	0.762174	0.0161103	0.980305	0.858514	0.975557	0.824497
			PC(17:0/18:1)	0.793721	0.015717	1.08564	0.385531	1.05773	0.553099
			PC(17:0/20:3)	0.722507	0.00230512	1.17213	0.131031	0.969673	0.768707
			PC(18:0/18:1)	0.813954	0.0256164	1.02868	0.756899	1.05586	0.552042
			PC(18:0/18:2)	0.827715	0.0491899	1.03959	0.684161	1.08307	0.403572
			PC(18:0/20:3)	0.833517	0.0480802	1.03341	0.719288	1.09072	0.343019
			PC(18:1/16:1)	0.80735	0.0204741	1.02606	0.778277	1.07065	0.455435
			PC(18:1/18:1)	0.821266	0.0439265	1.02659	0.786678	1.06179	0.536633
			PC(18:1/18:2)	0.815917	0.0481179	1.0223	0.829102	1.07137	0.500159
			PC(18:1/18:3)	0.823372	0.0386334	1.05352	0.576069	1.09147	0.34842
			PC(18:1/20:3)	0.826054	0.0302541	1.02209	0.802582	1.08419	0.355759
			PC(18:2/16:1)	0.812447	0.0306656	1.01884	0.844576	1.06057	0.537165
			PC(18:2/20:2)	0.807407	0.0440017	0.976494	0.821425	1.07445	0.495981
			PC(18:2/20:5)	0.821251	0.0443732	1.04597	0.643828	1.08902	0.380858
			PC(20:0/16:1)	0.799052	0.0366132	1.06204	0.571901	1.08628	0.437277
			PC(20:0/18:1)	0.777417	0.00660768	1.02144	0.816446	1.06459	0.493733
			PC(20:0/18:2)	0.802484	0.0481293	1.04605	0.683765	1.00647	0.953467
			PC(20:0/20:4)	0.780315	0.00945595	1.07907	0.420404	1.03273	0.732854
			PC(20:0/20:5)	0.788289	0.0359294	1.05849	0.613297	1.04509	0.694938
			Total PC	0.831646	0.0336091	1.03211	0.713294	1.07128	0.423912
	Phosphatidylinositol	PI Ester	PI(18:1/20:3)	0.717573	0.0380133	0.941632	0.70465	1.07961	0.629326
			PI(18:1/20:4)	0.741605	0.0400088	0.996096	0.978382	1.0563	0.704485
	MAG	Ester	MAG(18:3)	0.804513	0.0478247	0.916311	0.423549	1.06856	0.54354
			MAG(18:4)	0.771807	0.0287935	0.922606	0.4929	1.08449	0.4899
	Diacylglycerol	DAG Ester	DAG(12:0/18:1)	0.757664	0.0351738	0.871351	0.292757	1.10828	0.431735
			DAG(15:0/18:1)	0.829357	0.0316106	0.986677	0.876455	1.11132	0.222468
			DAG(16:0/16:1)	0.821718	0.0293745	0.996256	0.966495	1.08332	0.370915
			DAG(16:0/18:1)	0.825099	0.0230699	1.00431	0.95905	1.06813	0.431863
			DAG(16:0/18:2)	0.823421	0.0454718	0.975566	0.797439	1.04514	0.647021
			DAG(16:0/18:3)	0.812732	0.0159253	0.985321	0.861953	1.02545	0.767586
			DAG(16:0/20:3)	0.816811	0.0181825	0.967317	0.695039	1.04592	0.59645
			DAG(16:0/20:4)	0.823594	0.0281363	0.973164	0.756118	1.06325	0.484107
			DAG(16:0/22:6)	0.808383	0.0209569	0.993712	0.944848	1.06212	0.508956
			DAG(16:1/16:1)	0.813368	0.0418149	0.996008	0.968302	1.10899	0.305106
			DAG(16:1/18:0)	0.825972	0.0433392	1.00896	0.924316	1.09168	0.350892
			DAG(16:1/18:1)	0.816567	0.0224384	0.994237	0.947558	1.08595	0.34886
			DAG(16:1/18:2)	0.818147	0.0203682	0.961039	0.64269	1.06072	0.491585
			DAG(16:1/18:3)	0.830972	0.0354501	1.00529	0.95184	1.05422	0.545464
			DAG(16:1/20:0)	0.823519	0.0263677	0.999699	0.997225	1.09867	0.278282
			DAG(16:1/20:2)	0.782279	0.00227366	0.979398	0.79216	1.06407	0.432288
			DAG(16:1/20:4)	0.824968	0.0384238	0.967304	0.718383	1.07742	0.419038
			DAG(16:1/22:6)	0.815921	0.0294502	1.00172	0.985203	1.05953	0.532454
			DAG(18:0/18:1)	0.816588	0.04274	0.977372	0.817536	1.07444	0.46963
			DAG(18:0/18:3)	0.830604	0.0282106	1.02093	0.804783	1.01884	0.823704
			DAG(18:1/18:1)	0.806944	0.0159311	0.998246	0.984082	1.079	0.388102
			DAG(18:1/20:2)	0.800682	0.00619703	1.0007	0.992977	1.08585	0.30435
			DAG(18:1/20:3)	0.819	0.017086	0.980913	0.815958	1.04965	0.558656
			DAG(18:1/20:4)	0.832946	0.0362142	0.972709	0.749154	1.0716	0.424716
			DAG(18:1/22:6)	0.823496	0.0262138	0.980397	0.819009	1.05212	0.557285
			DAG(18:2/20:4)	0.811494	0.0416995	0.966927	0.741011	1.06164	0.556818
			DAG(18:2/20:5)	0.818405	0.0345131	1.02033	0.830393	1.03914	0.682905
			DAG(18:2/22:5)	0.83099	0.040558	0.976114	0.787459	1.03693	0.685928
			Total DAG	0.827454	0.0232962	0.987564	0.87966	1.06326	0.458458
	Triacylglycerol	TAG Ester	TAG55:6-FA20:3	0.83554	0.0205314	1.00759	0.921499	1.07247	0.362754
	Free Fatty Acids	Polyunsaturated FFA (PUFA)	FFA(20:2)	0.835052	0.0402097	0.983236	0.846176	1.03958	0.65615
			FFA(20:4)	0.815686	0.0370487	0.977762	0.816432	1.02856	0.771299
			FFA(22:4)	0.816521	0.0445357	0.982131	0.857058	1.06936	0.503272
		Saturated FFA	FFA(24:0)	0.807312	0.032678	1.07645	0.458722	1.06108	0.550798
	* Include only changes that are at least 15% different

## Sheet: 1c - Table 3 HD4 T5min_T0 
	Supplemental TABLE 3			Fold Change T5/T0 min
	SUPER_PATHWAY	SUB_PATHWAY	BIOCHEMICAL	Con	p	mPR-KD	p	ABHD2-KD	p
	Lipid	Fatty Acid Metabolism (also BCAA Metabolism)	methylmalonate (MMA)	1.05028	0.894335	2.07222	0.0502333	2.07192	0.0502793
	Lipid	Fatty Acid, Dicarboxylate	2-hydroxyglutarate	0.606296	0.011314	0.804564	0.26617	1.04083	0.83748
	Lipid	Long Chain Fatty Acid	arachidate (20:0)	0.825094	0.0413174	0.988169	0.898678	1.08696	0.37304
	Lipid	Long Chain Fatty Acid	eicosenoate (20:1)	0.731095	0.0196231	1.17181	0.233829	0.902248	0.43913
	Lipid	Long Chain Fatty Acid	pentadecanoate (15:0)	0.842259	0.043822	1.08206	0.351399	1.07486	0.393506
	Lipid	Long Chain Fatty Acid	10-nonadecenoate (19:1n9)	0.922365	0.553315	1.31652	0.0451983	1.00562	0.967164
	Lipid	Mevalonate Metabolism	3-hydroxy-3-methylglutarate	0.803329	0.0503738	1.01857	0.868469	1.23413	0.0599992
	Lipid	Phospholipid Metabolism	phosphoethanolamine	0.820138	0.0344726	1.0052	0.955529	1.13604	0.171584
	Lipid	Sterol	cholesterol	0.837787	0.0206266	1.0618	0.428594	1.123	0.126965
	Lipid	Progestin Steroids	progesterone	4.0074	1.48054e-09	4.17797	5.51864e-10	7.0403	1.02311e-15

## Sheet: 1d - Table 4 HD4 T5min_T0
	Supplemental TABLE 4			Fold Change T5/T0 min
	SUPER_PATHWAY	SUB_PATHWAY	BIOCHEMICAL	Con	p	mPR-KD	p	ABHD2-KD	p
	Amino Acid	Urea cycle; Arginine and Proline Metabolism	3-amino-2-piperidone	0.835375	0.0291374	1.00596	0.942049	1.098	0.253607
	Amino Acid	Glycine, Serine and Threonine Metabolism	N-acetylserine	0.894064	0.290023	1.04549	0.673644	1.26004	0.0300969
	Carbohydrate	Pentose Metabolism	ribonate	0.504391	0.0421585	0.853422	0.635369	1.17471	0.630001
	Carbohydrate	Nucleotide Sugar	UDP-glucose/UDP-galactose	0.818577	0.0251843	1.01665	0.852063	1.14472	0.128655
	Carbohydrate	Glycolysis, Gluconeogenesis, and Pyruvate Metabolism	lactate	0.820717	0.257142	1.00152	0.993009	1.48997	0.0232226
	Energy	TCA Cycle	fumarate	0.814772	0.0253767	0.996933	0.972999	1.04821	0.604005
	Cofactors and Vitamins	Vitamin A Metabolism	carotene diol (1)	0.836936	0.0302324	1.06499	0.439671	1.12108	0.161867
	Cofactors and Vitamins	Tocopherol Metabolism	gamma-tocopherol/beta-tocopherol	0.808333	0.0447808	1.05062	0.638966	1.15326	0.176839
	Cofactors and Vitamins	Pantothenate and CoA Metabolism	pantothenate	0.83066	0.0477941	1.03232	0.732488	1.11265	0.252393
	Cofactors and Vitamins	Vitamin B6 Metabolism	pyridoxal	0.770557	0.0385803	1.07525	0.561698	1.02928	0.817363
	Cofactors and Vitamins	Vitamin B6 Metabolism	pyridoxamine phosphate	0.831126	0.0422897	1.07573	0.419729	1.19887	0.0463885
	Nucleotide	Purine Metabolism, Adenine containing	adenosine 5'-monophosphate (AMP)	0.816876	0.024504	1.07794	0.399964	1.20637	0.0367075
	Nucleotide	Purine Metabolism, Guanine containing	guanosine	0.93961	0.636021	1.03436	0.797376	1.3971	0.0120515
	Nucleotide	Pyrimidine Metabolism, Uracil containing	uridine 5'-monophosphate (UMP)	0.845869	0.0896187	1.04682	0.640924	1.22964	0.0366026
	Nucleotide	Pyrimidine Metabolism, Uracil containing	uridine	0.929337	0.650695	1.09978	0.556854	1.39448	0.0414737
	Nucleotide	Pyrimidine Metabolism, Cytidine containing	cytidine	0.9241	0.593242	1.12902	0.411891	1.33841	0.0501338

## Sheet: 1e -Table 5 HD4 T30min_T0 
	Supplemental TABLE 5			Fold Change T30/T0 min
	SUPER PATHWAY	SUB_PATHWAY	BIOCHEMICAL	Con	p	mPR-KD	p	ABHD2-KD	p
	Lipid	Carnitine Metabolism	carnitine	0.830768	0.041226	1.07874	0.400858	1.0274	0.764162
		Fatty Acid, Branched	(12 or 13)-methylmyristate (a15:0 or i15:0)	0.762969	0.00952492	1.00501	0.961293	1.10446	0.335538
		Glycerolipid Metabolism	glycerophosphoglycerol	0.823557	0.0466364	1.03586	0.715995	0.918775	0.382293
		Long Chain Fatty Acid	eicosenoate (20:1)	0.626009	0.000569648	1.01321	0.921273	0.997058	0.9823
		Long Chain Fatty Acid	arachidate (20:0)	0.755951	0.00325013	0.991822	0.929995	1.11605	0.241384
		Long Chain Fatty Acid	palmitate (16:0)	0.786392	0.00616906	1.04184	0.635579	1.07742	0.389122
		Long Chain Fatty Acid	10-heptadecenoate (17:1n7)	0.758952	0.00622281	1.08759	0.398716	1.02353	0.814945
		Long Chain Fatty Acid	pentadecanoate (15:0)	0.791328	0.00633331	1.08071	0.359071	1.0271	0.751652
		Long Chain Fatty Acid	oleate/vaccenate (18:1)	0.741154	0.00786069	1.06781	0.555246	1.01227	0.912634
		Long Chain Fatty Acid	palmitoleate (16:1n7)	0.758865	0.0149964	1.05963	0.605657	1.04263	0.709731
		Long Chain Fatty Acid	myristate (14:0)	0.787899	0.0306652	1.04397	0.693837	1.10406	0.36581
		Phospholipid Metabolism	phosphoethanolamine	0.800838	0.0181137	1.01833	0.845114	1.02919	0.757004
		Phospholipid Metabolism	cytidine-5'-diphosphoethanolamine	0.809379	0.0238508	1.09683	0.319505	1.04668	0.622624
		Polyunsaturated Fatty Acid (n3 and n6)	mead acid (20:3n9)	0.723202	0.00558179	1.11398	0.349554	0.979181	0.855085
		Polyunsaturated Fatty Acid (n3 and n6)	arachidonate (20:4n6)	0.726583	0.00980193	1.09295	0.466989	0.989699	0.932398
		Polyunsaturated Fatty Acid (n3 and n6)	linoleate (18:2n6)	0.757636	0.00985289	1.07357	0.504005	0.996306	0.972189
		Polyunsaturated Fatty Acid (n3 and n6)	tetradecadienoate (14:2)	0.7319	0.0161375	1.06543	0.621403	0.976827	0.854983
		Polyunsaturated Fatty Acid (n3 and n6)	dihomo-linolenate (20:3n3 or n6)	0.748141	0.0191157	1.08604	0.500854	0.974699	0.834321
		Polyunsaturated Fatty Acid (n3 and n6)	dihomo-linoleate (20:2n6)	0.789611	0.0338619	1.04851	0.667874	1.02484	0.824097
		Polyunsaturated Fatty Acid (n3 and n6)	docosadienoate (22:2n6)	0.711176	0.0455872	1.00203	0.99045	1.00213	0.989959
		Sterol	cholesterol	0.760082	0.00040388	1.08393	0.287875	1.02941	0.701705
		Sterol	campesterol	0.753775	0.00465587	1.08552	0.404602	1.01238	0.900418
		Sterol	7-dehydrocholesterol	0.809526	0.018754	1.10956	0.243653	1.06606	0.47241
	Lipid	Progestin Steroids	progesterone	8.0397	3.04302e-17	6.58306	5.95993e-15	7.12656	7.42288e-16

## Sheet: 1f -Table 6 HD4 T30min_T0
	Supplemental TABLE 6			Fold Change T30/T0 min
	SUPER PATHWAY	SUB_PATHWAY	BIOCHEMICAL	Con	p	mPR-KD	p	ABHD2-KD	p
	Amino Acid	Urea cycle; Arginine and Proline Metabolism	3-amino-2-piperidone	0.813384	0.0124927	1.01074	0.895956	1.02715	0.74297
		Creatine Metabolism	creatine	0.831342	0.0136297	1.02505	0.738172	1.05334	0.482914
		Glutamate Metabolism	beta-citrylglutamate	0.805519	0.0170403	1.08611	0.357613	1.05467	0.552912
		Leucine, Isoleucine and Valine Metabolism	beta-hydroxyisovalerate	0.751754	0.0198702	1.18461	0.163895	0.945546	0.644332
		Glutamate Metabolism	glutamate	0.832348	0.0219609	1.03268	0.685116	1.05423	0.505698
		Lysine Metabolism	N6,N6,N6-trimethyllysine	0.833137	0.039712	1.03632	0.68535	1.07745	0.397403
		Tryptophan Metabolism	C-glycosyltryptophan	0.807863	0.0456192	1.06011	0.581749	1.10217	0.359152
	Carbohydrate	Nucleotide Sugar	UDP-glucose/UDP-galactose	0.822319	0.028632	1.01494	0.867028	1.02607	0.771372
		Aminosugar Metabolism	erythronate	0.836852	0.0397631	1.06543	0.461131	1.04722	0.591448
		Glycolysis, Gluconeogenesis, and Pyruvate	lactate	0.796265	0.191699	1.18624	0.32701	1.52663	0.0161673
	Energy	TCA Cycle	fumarate	0.805035	0.0180744	1.05393	0.56296	0.984876	0.866626
		TCA Cycle	malate	0.813424	0.0297499	1.0702	0.47155	1.02368	0.803666
	Cofactors and Vitamins	Ascorbate and Aldarate Metabolism	threonate	0.6846	0.00441196	1.02949	0.824436	1.17215	0.226616
		Hemoglobin and Porphyrin Metabolism	biliverdin	0.775135	0.0226939	1.02861	0.798842	1.06276	0.582483
		Nicotinate and Nicotinamide Metabolism	nicotinamide riboside	0.809155	0.0109099	1.04073	0.627131	1.07445	0.382693
		Riboflavin Metabolism	flavin adenine dinucleotide (FAD)	0.797627	0.0092476	1.07136	0.421943	1.0799	0.370684
		Riboflavin Metabolism	flavin mononucleotide (FMN)	0.803673	0.0178477	1.09698	0.311452	1.0331	0.721327
		Tocopherol Metabolism	gamma-tocopherol/beta-tocopherol	0.790174	0.026615	1.09904	0.370135	1.0449	0.676419
		Tocopherol Metabolism	alpha-tocopherol	0.76833	0.0273896	1.17933	0.16494	0.998231	0.98806
		Vitamin A Metabolism	carotene diol (1)	0.795075	0.00551582	1.07782	0.358003	1.02712	0.742347
		Vitamin A Metabolism	retinal	0.741448	0.0449522	1.02679	0.858254	1.03258	0.828563
		Vitamin B6 Metabolism	pyridoxal	0.71136	0.00719924	1.06565	0.611003	0.995224	0.969434
		Vitamin B6 Metabolism	pyridoxamine phosphate	0.789182	0.00970641	1.03901	0.672053	1.07764	0.408577
	Nucleotide	Purine Metabolism, (Hypo)Xanthine/Inosine	hypoxanthine	0.809135	0.0189213	1.03728	0.681871	1.06636	0.472137
		Purine Metabolism, Guanine containing	guanine	0.828	0.0234608	1.01107	0.893771	1.04118	0.624741
		Pyrimidine Metabolism, Cytidine containing	cytosine	0.805427	0.0260335	1.01232	0.89877	1.01978	0.838793
		Purine Metabolism, (Hypo)Xanthine/Inosine	xanthine	0.739831	0.0318063	1.02585	0.85442	1.04403	0.756814
		Purine Metabolism, Adenine containing	adenosine 5'-monophosphate (AMP)	0.832933	0.0417193	1.04644	0.61039	1.09047	0.331649
	Xenobiotics	Food Component/Plant	daidzein sulfate (2)	0.798911	0.00800753	0.985194	0.858233	1.0551	0.521007
		Chemical	perfluorooctanesulfonate (PFOS)	0.714618	0.0168801	1.07849	0.587108	1.29554	0.0643905
		Food Component/Plant	gluconate	0.689891	0.0224802	0.811865	0.196972	1.0678	0.683782
		Drug - Respiratory	diphenhydramine	0.784148	0.0374336	1.0788	0.513035	1.06455	0.589514
		Food Component/Plant	genistein sulfate	0.795736	0.0434853	1.02366	0.835028	1.08784	0.453796

## Sheet: 1g - Table 7 Single oocytes
	Supplemental Table 7
	Single Oocyte Metabolomics. Fold Change T30/T0 min after P4
	Compound	FC	p
	LPA(18:0/0:0)	3.17536	0.0230329
	20-hydroxy leukotriene B4	1.52422	0.00147176
	11-Hydroxyeicosatetraenoate glyceryl ester	1.23394	0.0140971
	LysoPE(20:5)	0.81505	0.0459123
	Sphingosine	0.803648	0.011871
	PS(16:0/14:1(9Z))	0.782494	0.00563578
	LysoPE(16:1/0:0)	0.703717	0.016418
	PE(18:1/18:2)	0.696679	0.0283929
	7-Dehydrodesmosterol	0.685818	0.0118867
	Anandamide	0.678688	0.0235218
	Heptanoic acid	0.664554	0.0322351
	Malabaricone C	0.655594	0.0174853
	7-Hydroxy-3-oxocholanoic acid	0.648395	0.00633193
	Formoterol	0.635961	0.0113479
	N-cis-octadec-9Z-enoyl-L-Homoserine lactone	0.635771	0.00749475
	(17Z)-3,11-Dioxopregna-4,17(20)-dien-21-oic acid methyl ester	0.634895	0.0169871
	punaglandin 8	0.634827	0.0139312
	N-Arachidonoyl glycine	0.615093	0.00266238
	LysoPE(0:0/24:0)	0.599567	0.0313316
	5b-Cholestane-3a,7a,12a,23S,25-pentol	0.58154	0.0287527
	LTB4 dimethyl amide	0.571711	0.00193614
	Adrenic acid	0.571483	0.000330393
	PA(P-20:0/0:0)	0.525842	3.62377e-05
	5-Oxo-6-trans-leukotriene B4	0.467983	0.00259861
	26-hydroxycholesterol 3-sulfate	0.43548	6.22323e-06

## Sheet: 1h - Table 8
	REAGENT	Source	Catalogue #
	Antibodies
	Rabbit polyclonal anti-ABHD2	Sigma-Aldrich	Cat# HPA005999
	Rabbit polyclonal anti-GFP	Living Colors	Cat# 632381
	Mouse monclonal anti-SNAP25	Biolegend	Cat# 836304
	Rabbit polyclonal anti-p-plk1	Cell signaling	Cat# 5472
	Mouse monoclonal anti-phospho-MAPK	Cell Signaling	Cat# 9106
	Rabbit polyclonal anti-phospho-Cdc2	Cell Signaling	Cat# 9111
	Rabbit polyclonal anti-Tubulin	Cell Signaling	Cat# 3873
	Rabbit polyclonal anti-Cdc25C (Ser216)	Cell signaling	Cat# 9528
	Rabbit polyclonal anti-S1PR3	Bioss	Cat# BS-7541R
	Goat anti-rabbit IgG-HRP	Jackson ImmunoResearch	Cat# 111-035-144
	Goat anti-rabbit IgG- IRDye® 800	Li-COR	Cat# 925-32211
	Goat anti-mouse IgG- IRDye® 680	Li-COR	Cat# 925-68070
	Goat anti-mouse IgG- IRDye® 800	Li-COR	Cat# 926-32210
	Mouse polyclonal anti-His	Takara	Cat# 631212
	Chemicals and kits
	Progesterone	Sigma-Aldrich	Cat# 200-350-9
	Pitstop® 2	Abcam	Cat# ab120687
	Pitstop® 2 - negative control	Abcam	Cat# ab120688
	Mammalian ProteaseArrestTM	G-Biosciences	Cat# 786-331
	PhosphataseArrestTM	G-Biosciences	Cat# 786-451
	µMACS GFP Isolation Kit	Miltenyi Biotech	Cat# 130-091-125
	ECL™ Prime Western Blotting Detection Reagent	GE Healthcare Amersham™	Cat# 45-002-401
	The XL QuikChange mutagenesis kit	Agilent Technologies	Cat# 200516
	The mMessage mMachine T7 kit	ThermoFisher	Cat# AM1344
	Fast SYBRTM Green Master Mix	ThermoFisher	Cat# 4385616
	RNeasy Mini Kit	Qiagen	Cat# 74104
	Rabbit Reticulocyte Lysate	Promega	Cat# L4960
	ALiCEÒ	Sigma	Cat# AL0103200
	TrancendTM tRNA	Promega	Cat# L5061
	Phospholipase A2 Activity assay kit	Abcam	Cat# ab273278
	FAAH	Sigma-Aldrich	Cat# 341249
	MJN110	Sigma-Aldrich	Cat# SML0872
	JZL184	Sigma-Aldrich	Cat# J3455
	Pristimerin	Sigma-Aldrich	Cat# P0020
	Lupeol	Sigma-Aldrich	Cat# L5632
	ML395	Merck	Cat# 532978
	cPLA2 Inh II	Sigma-Aldrich	Cat# 5305380001
	ACA	Sigma-Aldrich	Cat# A8486
	Bromoenol lactone	Sigma-Aldrich	Cat# B1552
	AACOCF3	Abcam	Cat# ab120350
	Mastoparan	Enzo	Cat# BML-G410-0001
	HA130	Tocris	Cat# 4196
	MK591	Sigma-Aldrich	Cat# 147030-01-1
	NS398	Sigma-Aldrich	Cat# 349254
	SC-560	Sigma-Aldrich	Cat# 565610
	D-erythro MAPP	Enzo	Cat# SL221
	L-erythro MAPP	Enzo	Cat# SL222
	MP-A08	Tocris	Cat# 5803
	NF-449	Sigma-Aldrich	Cat# 480420
	Gallein	Sigma-Aldrich	Cat# 371708
	YM-254890	Cayman	Cat# 29735
			Cat# 29735
	Org OD-02-0	Axon Med Chem	Cat# 2085
	Software
	Image Studio 5.2	LI-COR Biosciences	N/A
	ImageJ	Schneider et al. 2012	N/A
	Prism	GraphPad inc.	N/A
	Illustrator CC	Adobe Systems Inc	N/A
	Photoshop CC	Adobe Systems Inc	N/A
	ZEN 2.3 black	Zeiss	N/A
	Quant Studio Real-Time PCR software.Ink	ThermoFisher	N/A
	Biorender	Biorender	N/A

## Sheet: 1i -Table 9
	Control antisense	gcgactatacgcgcaatatg
	ABHD2.LS antisense	aactcccatgtgcatccata
	mPR antisense	cggtagtcatggtagtaggg
	S1PR3 antisense	acttcacaggcaacatctat
	mPR S125A – F	tcacctatctcacatgcgccatcctggctcatctgc
	mPR S125A - R	gcagatgagccaggatggcgcatgtgagataggtga
	ABHD2.S H120A - F	ttttctcctgtgcaggcttcagctaatggttcaaataggtcaaag
	ABHD2.S H120A - R	ctttgacctatttgaaccattagctgaagcctgcacaggagaaaa
	ABHD2.S N125A - F	cagattaccatggtgacagcttctcctgtgcagtgttcag
	ABHD2.S N125A - R	ctgaacactgcacaggagaagctgtcaccatggtaatctg
	Xenopus mPRβ – F	cccgttgtccaccggatagt
	Xenopus mPRβ – R	ggtgaccgtgccctataaaa
	Xenopus ABHD2.LS – F	atgggagtttggagctatggta
	Xenopus ABHD2.LS – R	actctctcttggttggatgca
	Xenopus ABHD2.S – F	gaggaaattccacggttacaag
	Xenopus ABHD2.S – R	catgtagaggcaataccaccaa
	Xenopus S1PR2 – F	ggttgccggcatttatcatcc
	Xenopus S1PR2– R	gtggccactttaaactctgcc
	Xenopus S1PR3 – F	tgctccacaatcttgcctctg
	Xenopus S1PR3– R	tcctgagaagtgccatggatc
	Xenopus ODC – F	gccattgtgaagactctctccattc
	Xenopus ODC – R	ttcgggtgattccttgccac
